# Supplementary material
Source: Springer Nature journal article supplement (https://www.springermedizin.de/resource/supplementary/12968_2012_3287_MOESM5_ESM.pdf/9583552)

# Longitudinal

# Radial

# Circumferential

Base

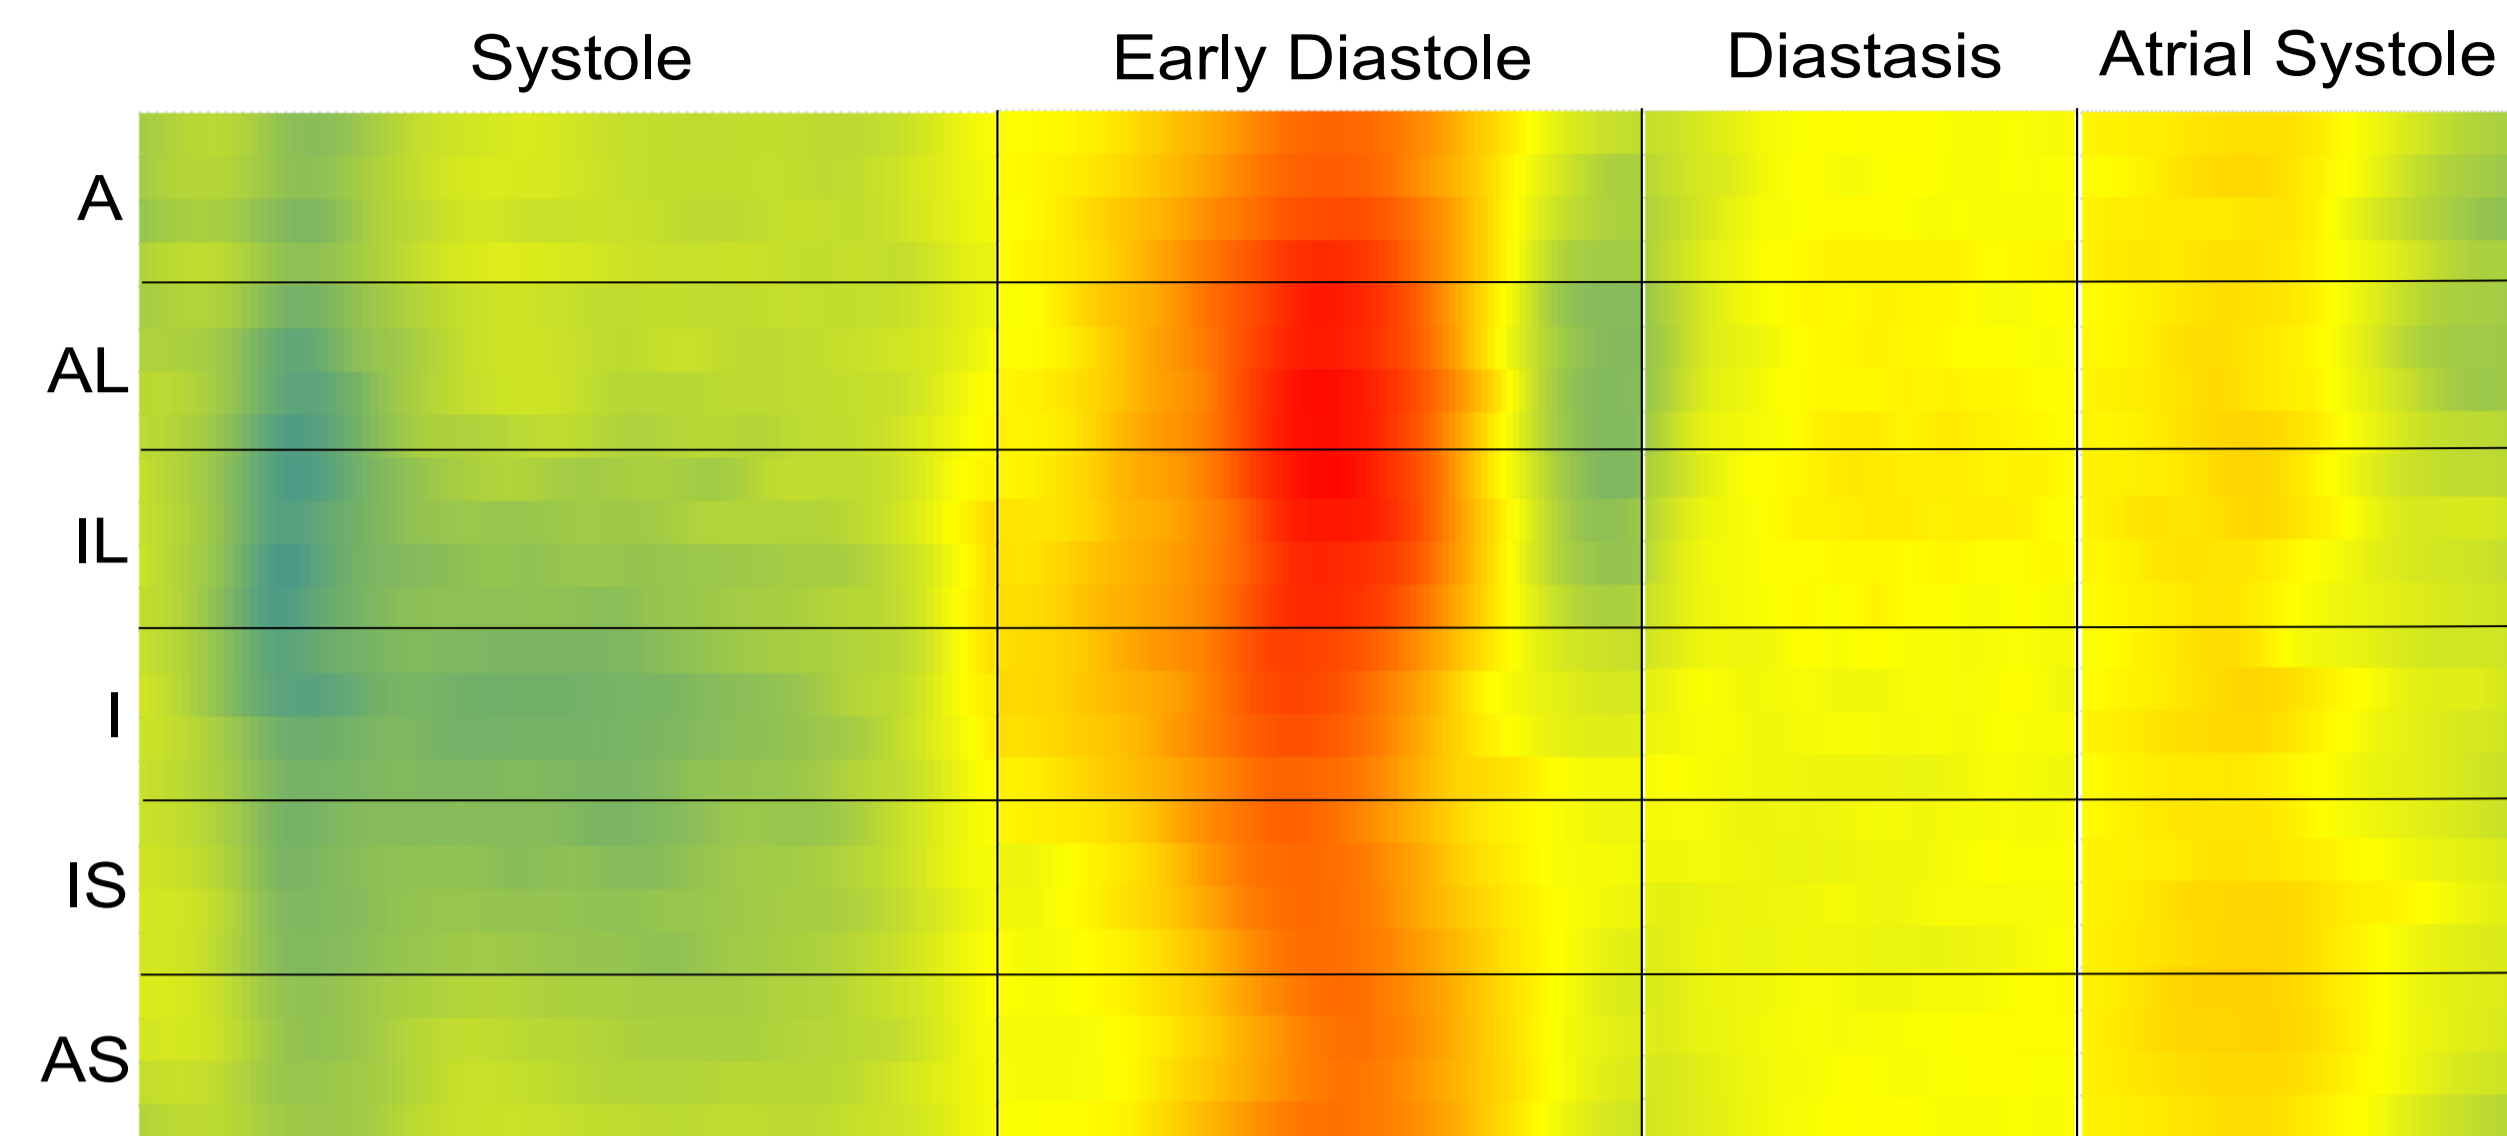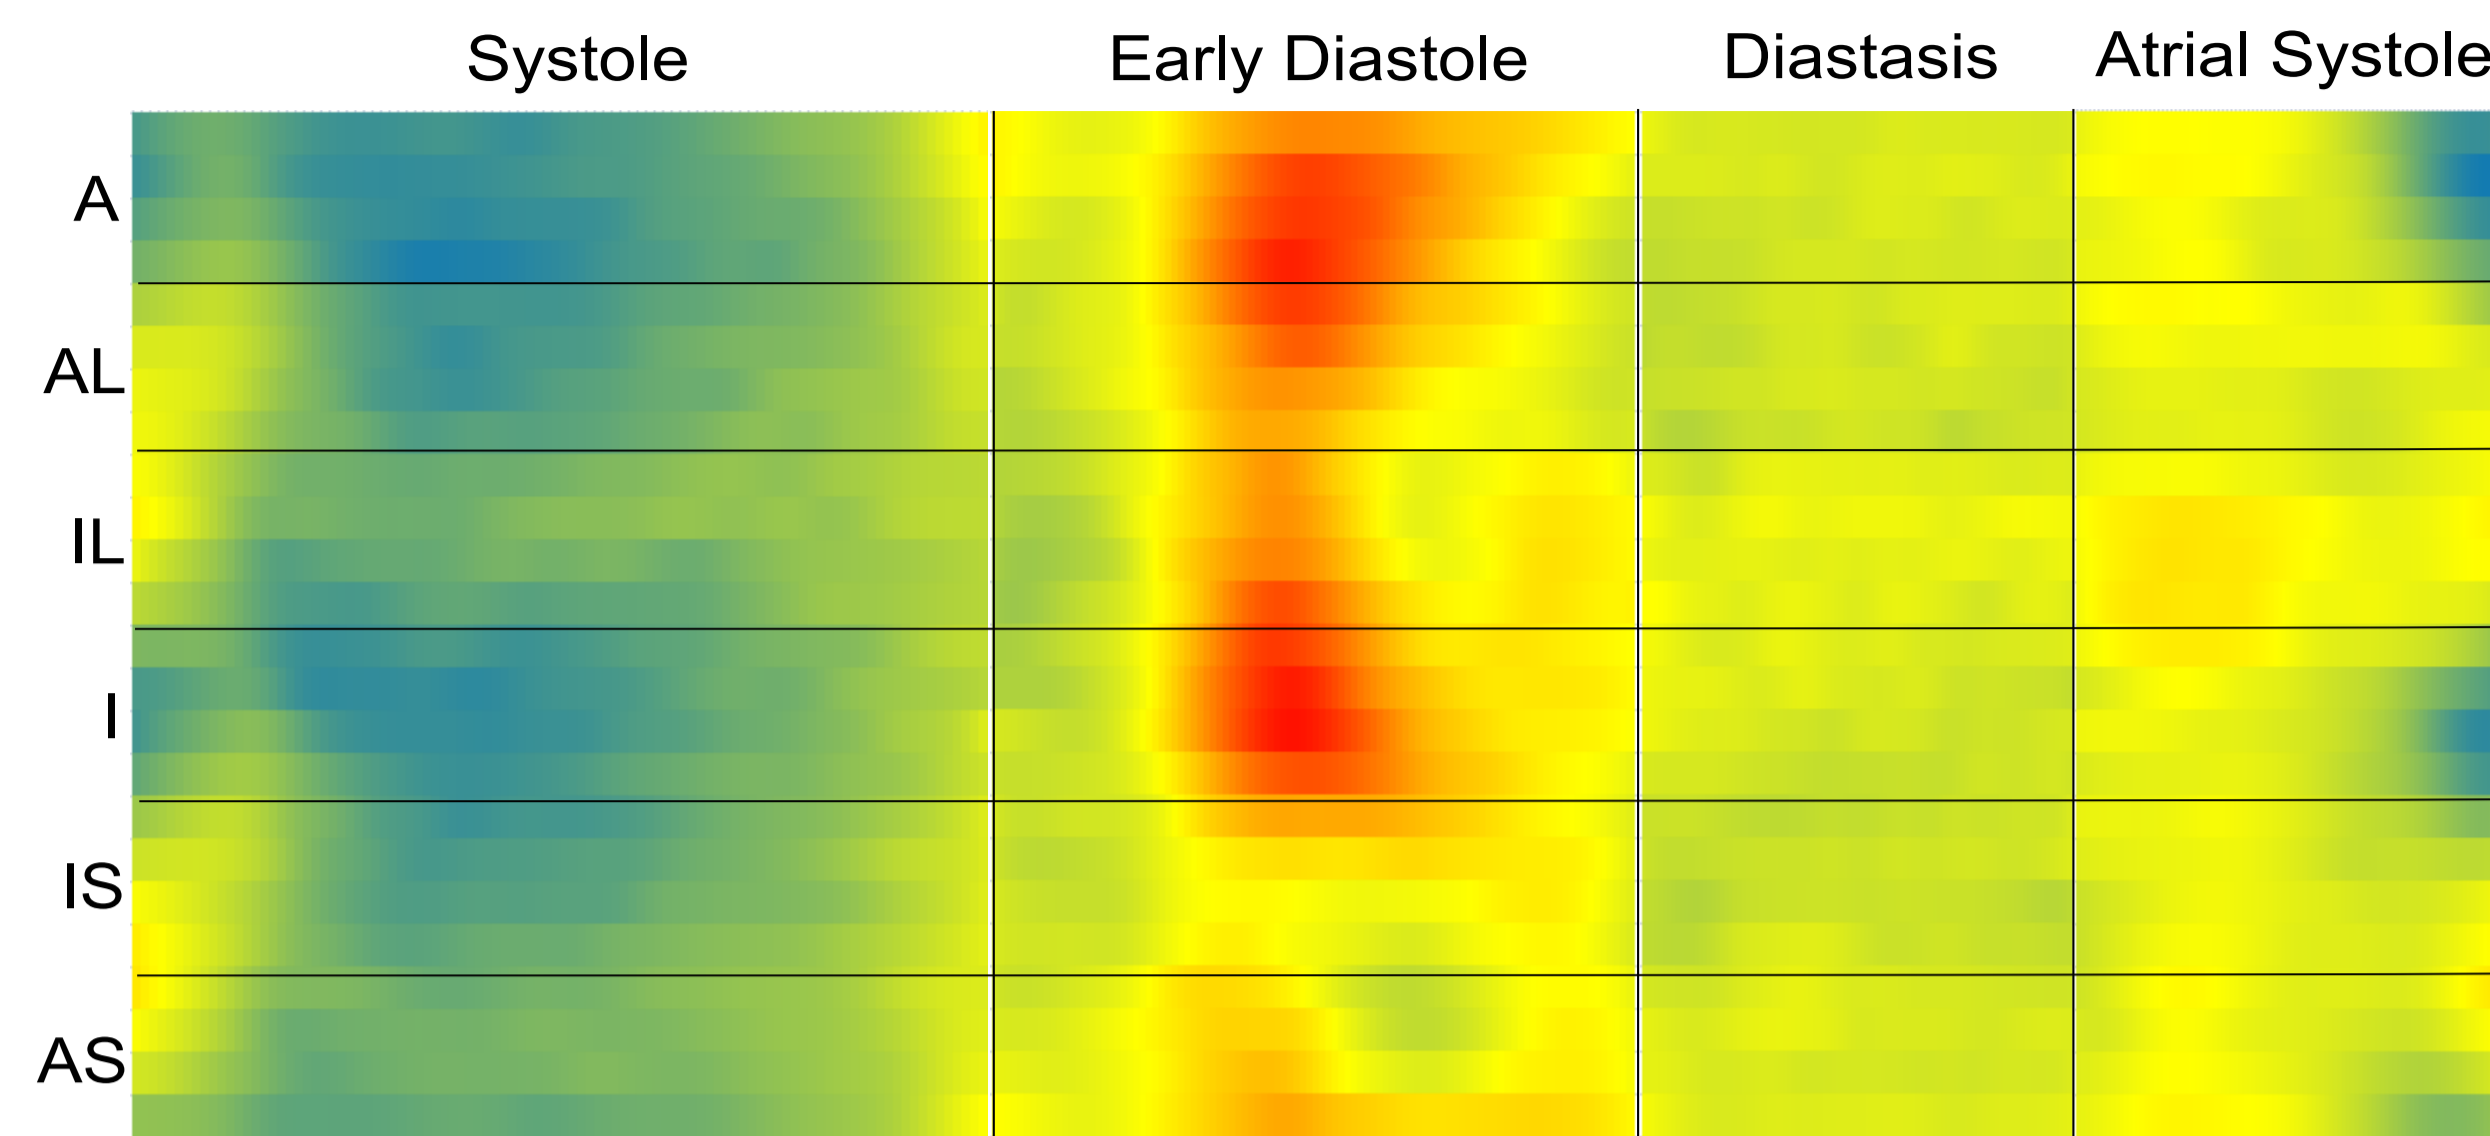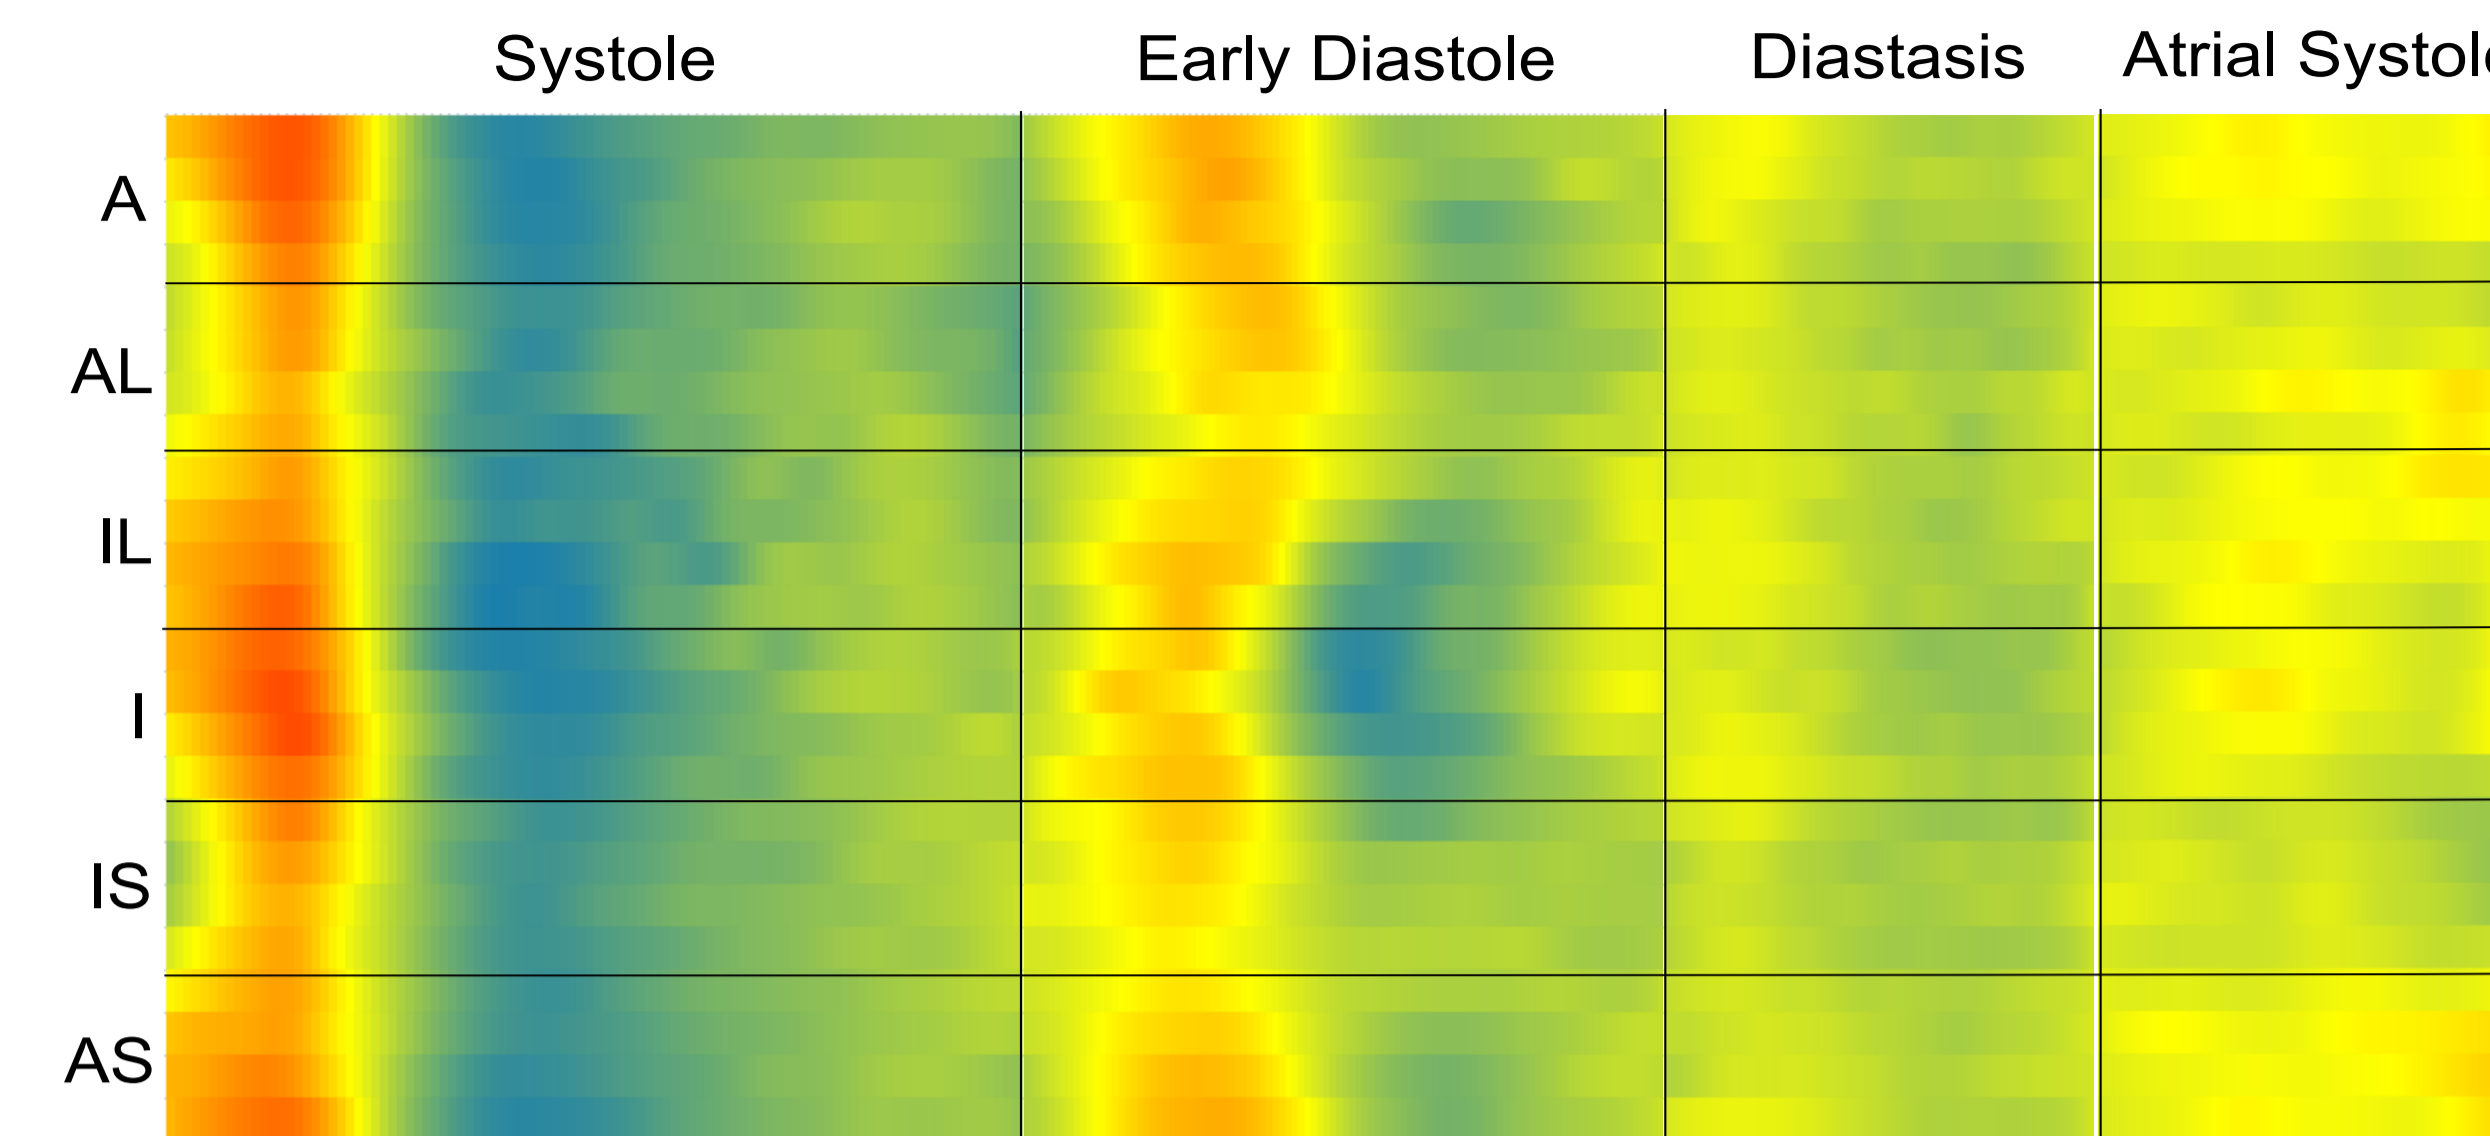

Mid

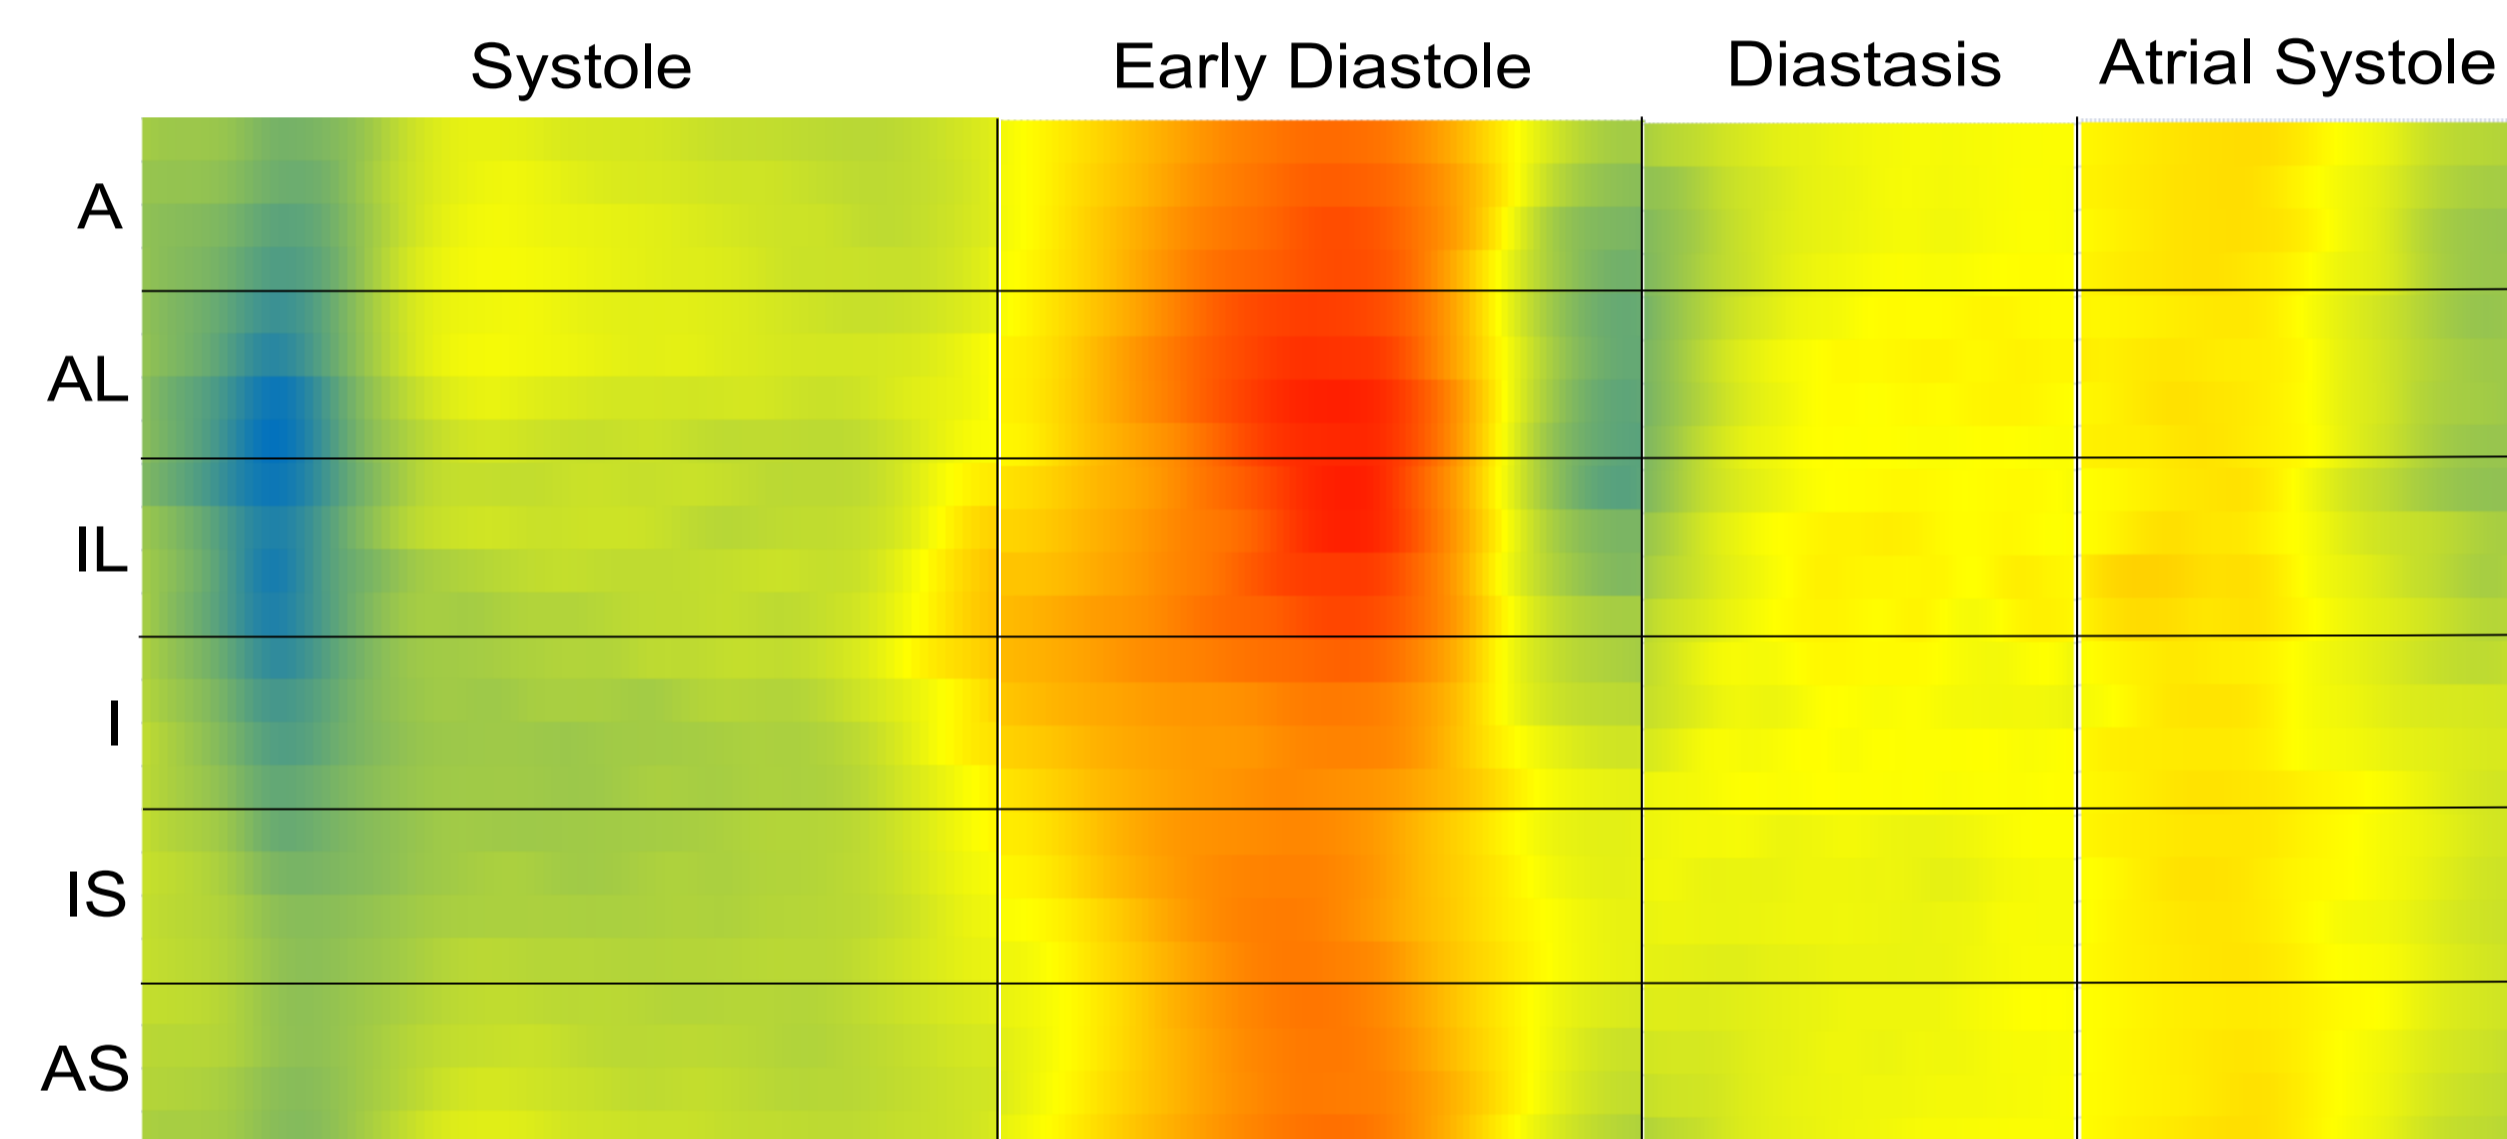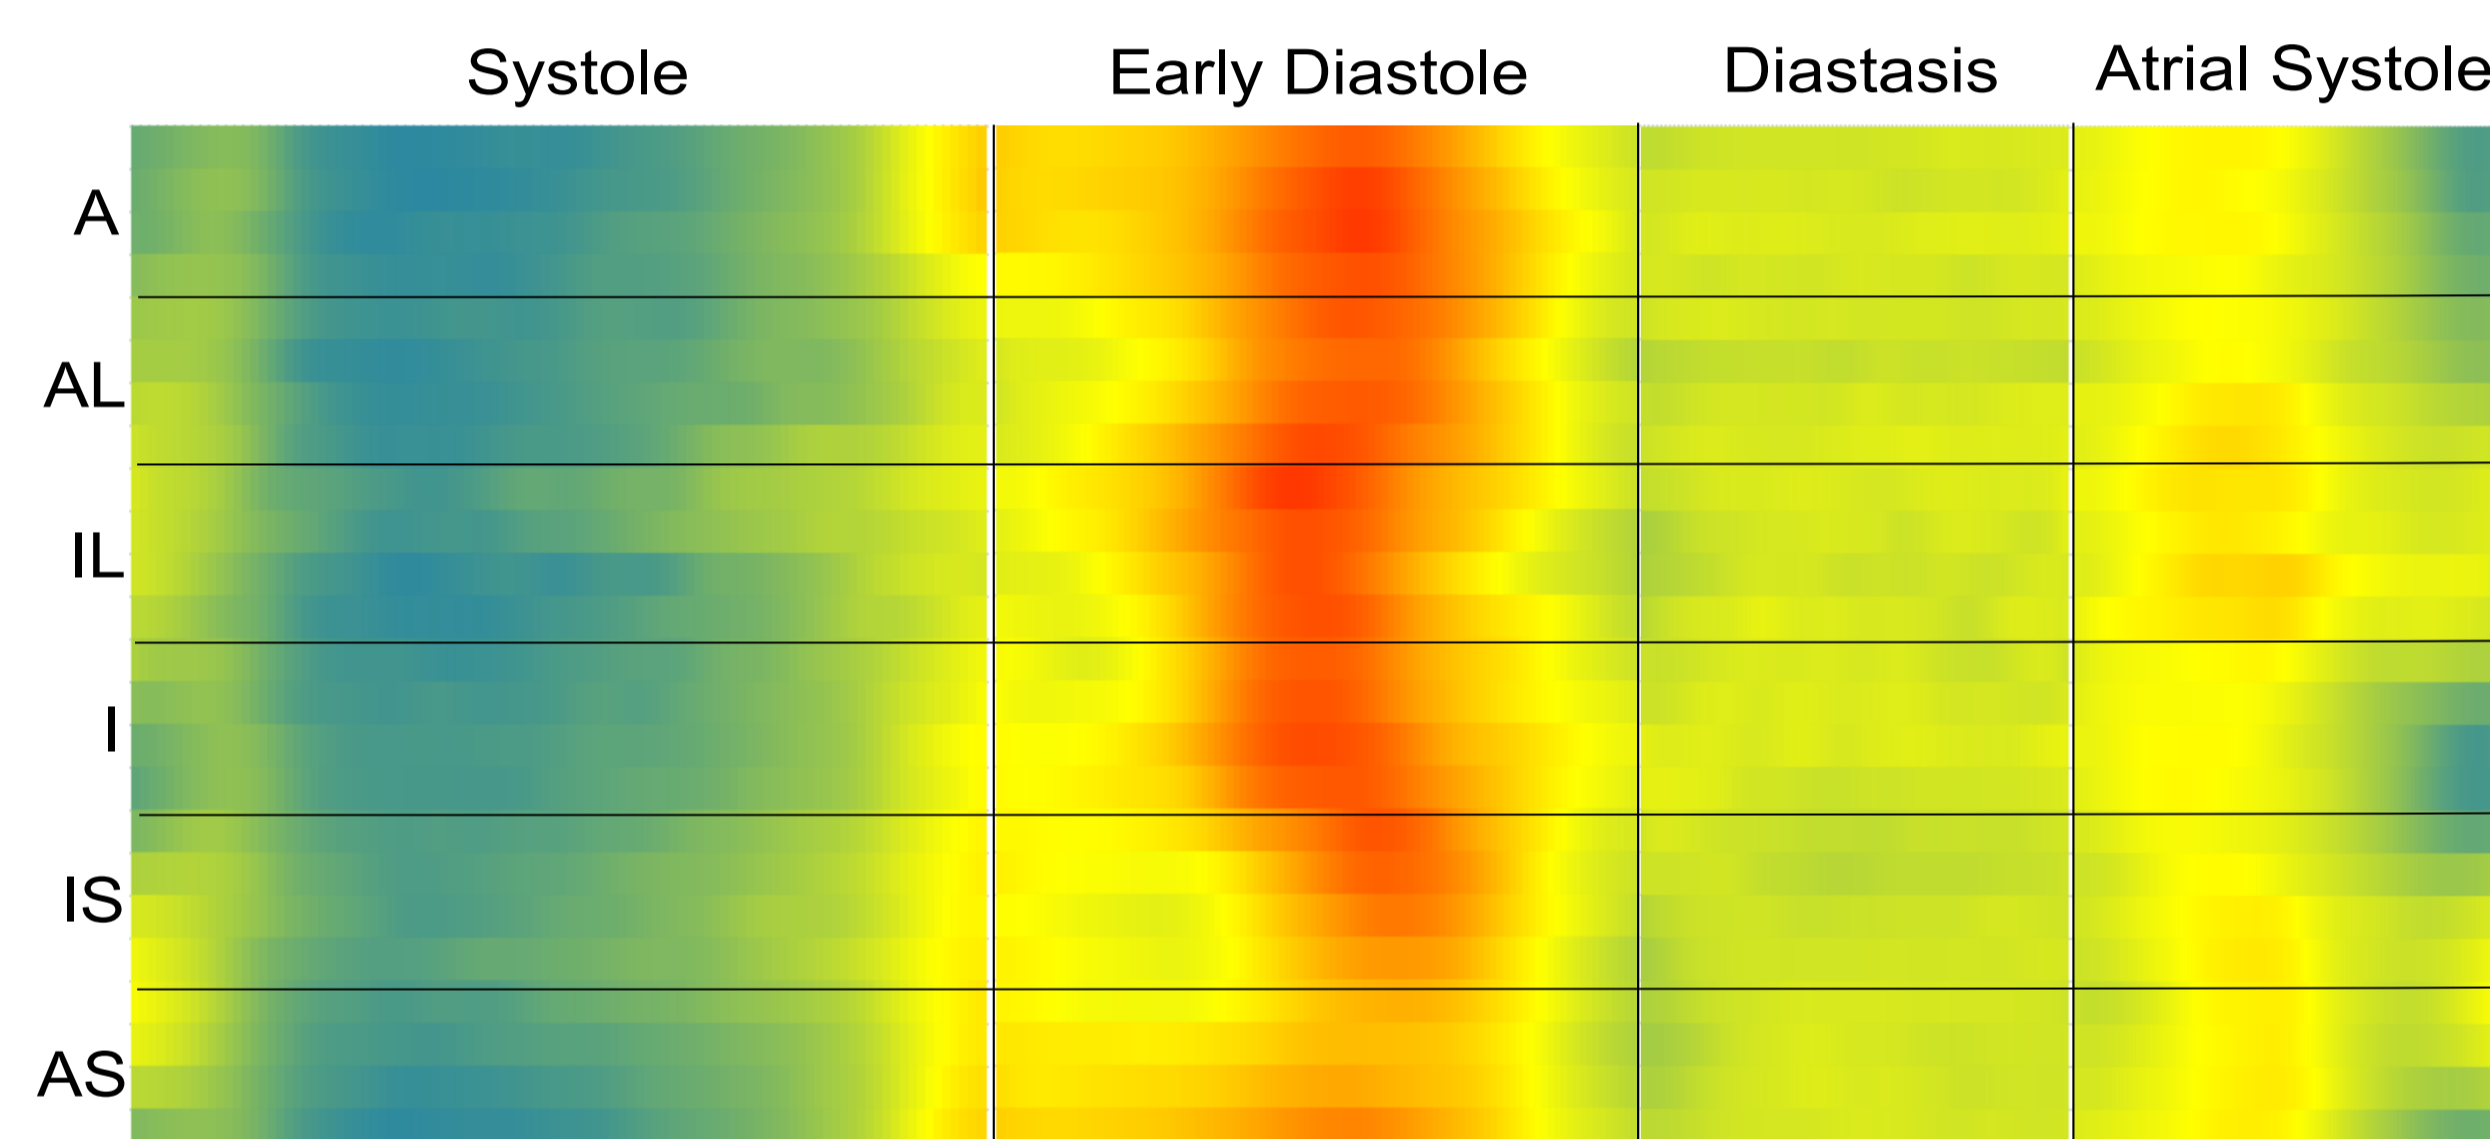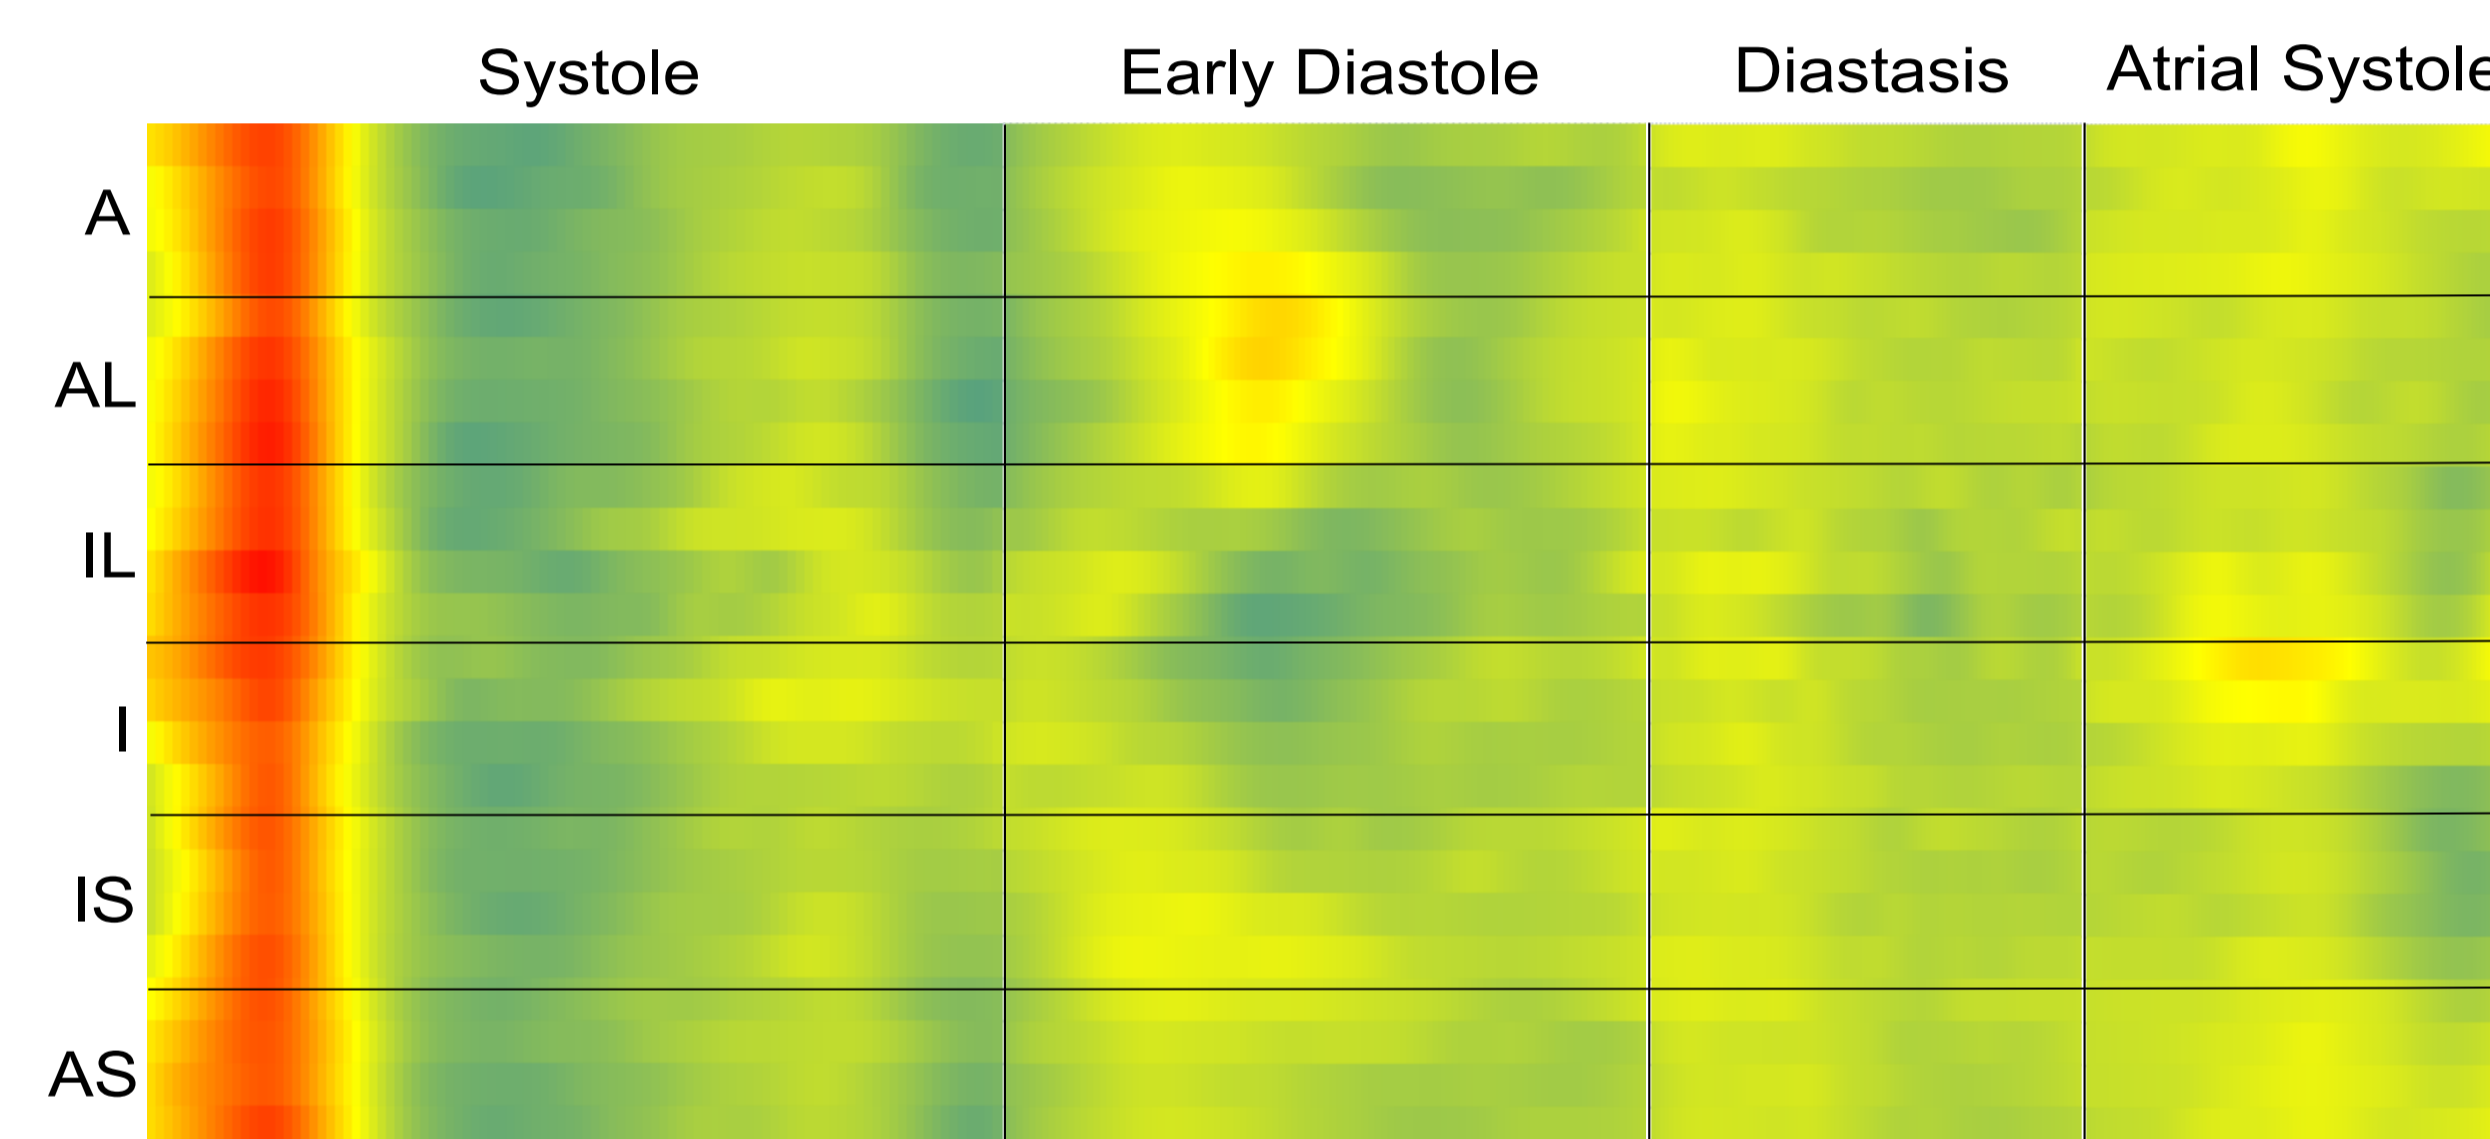

Apex

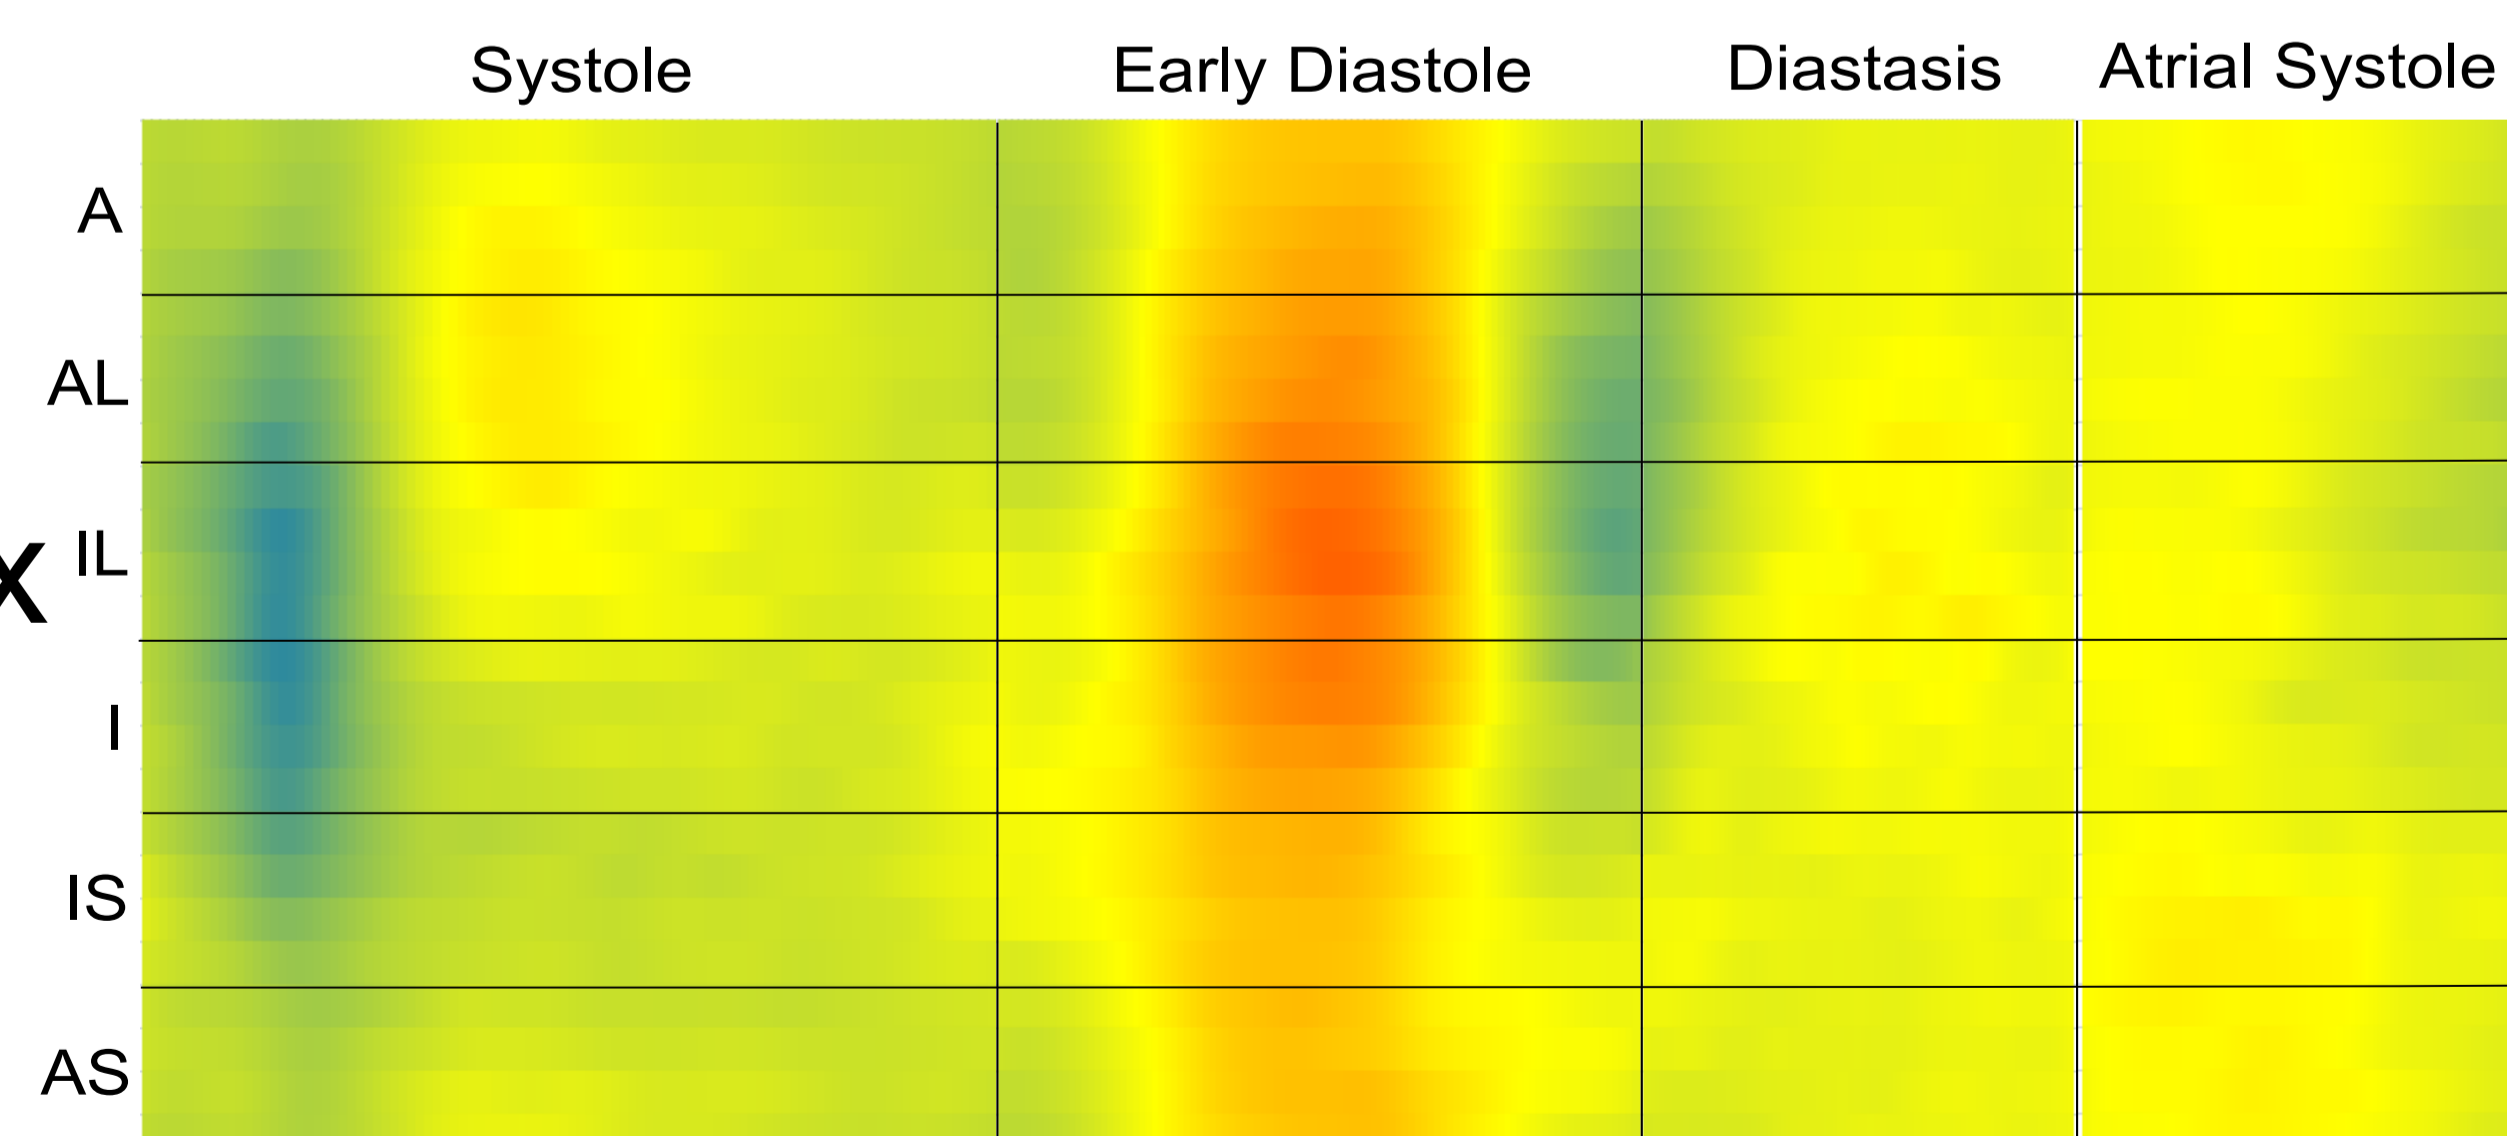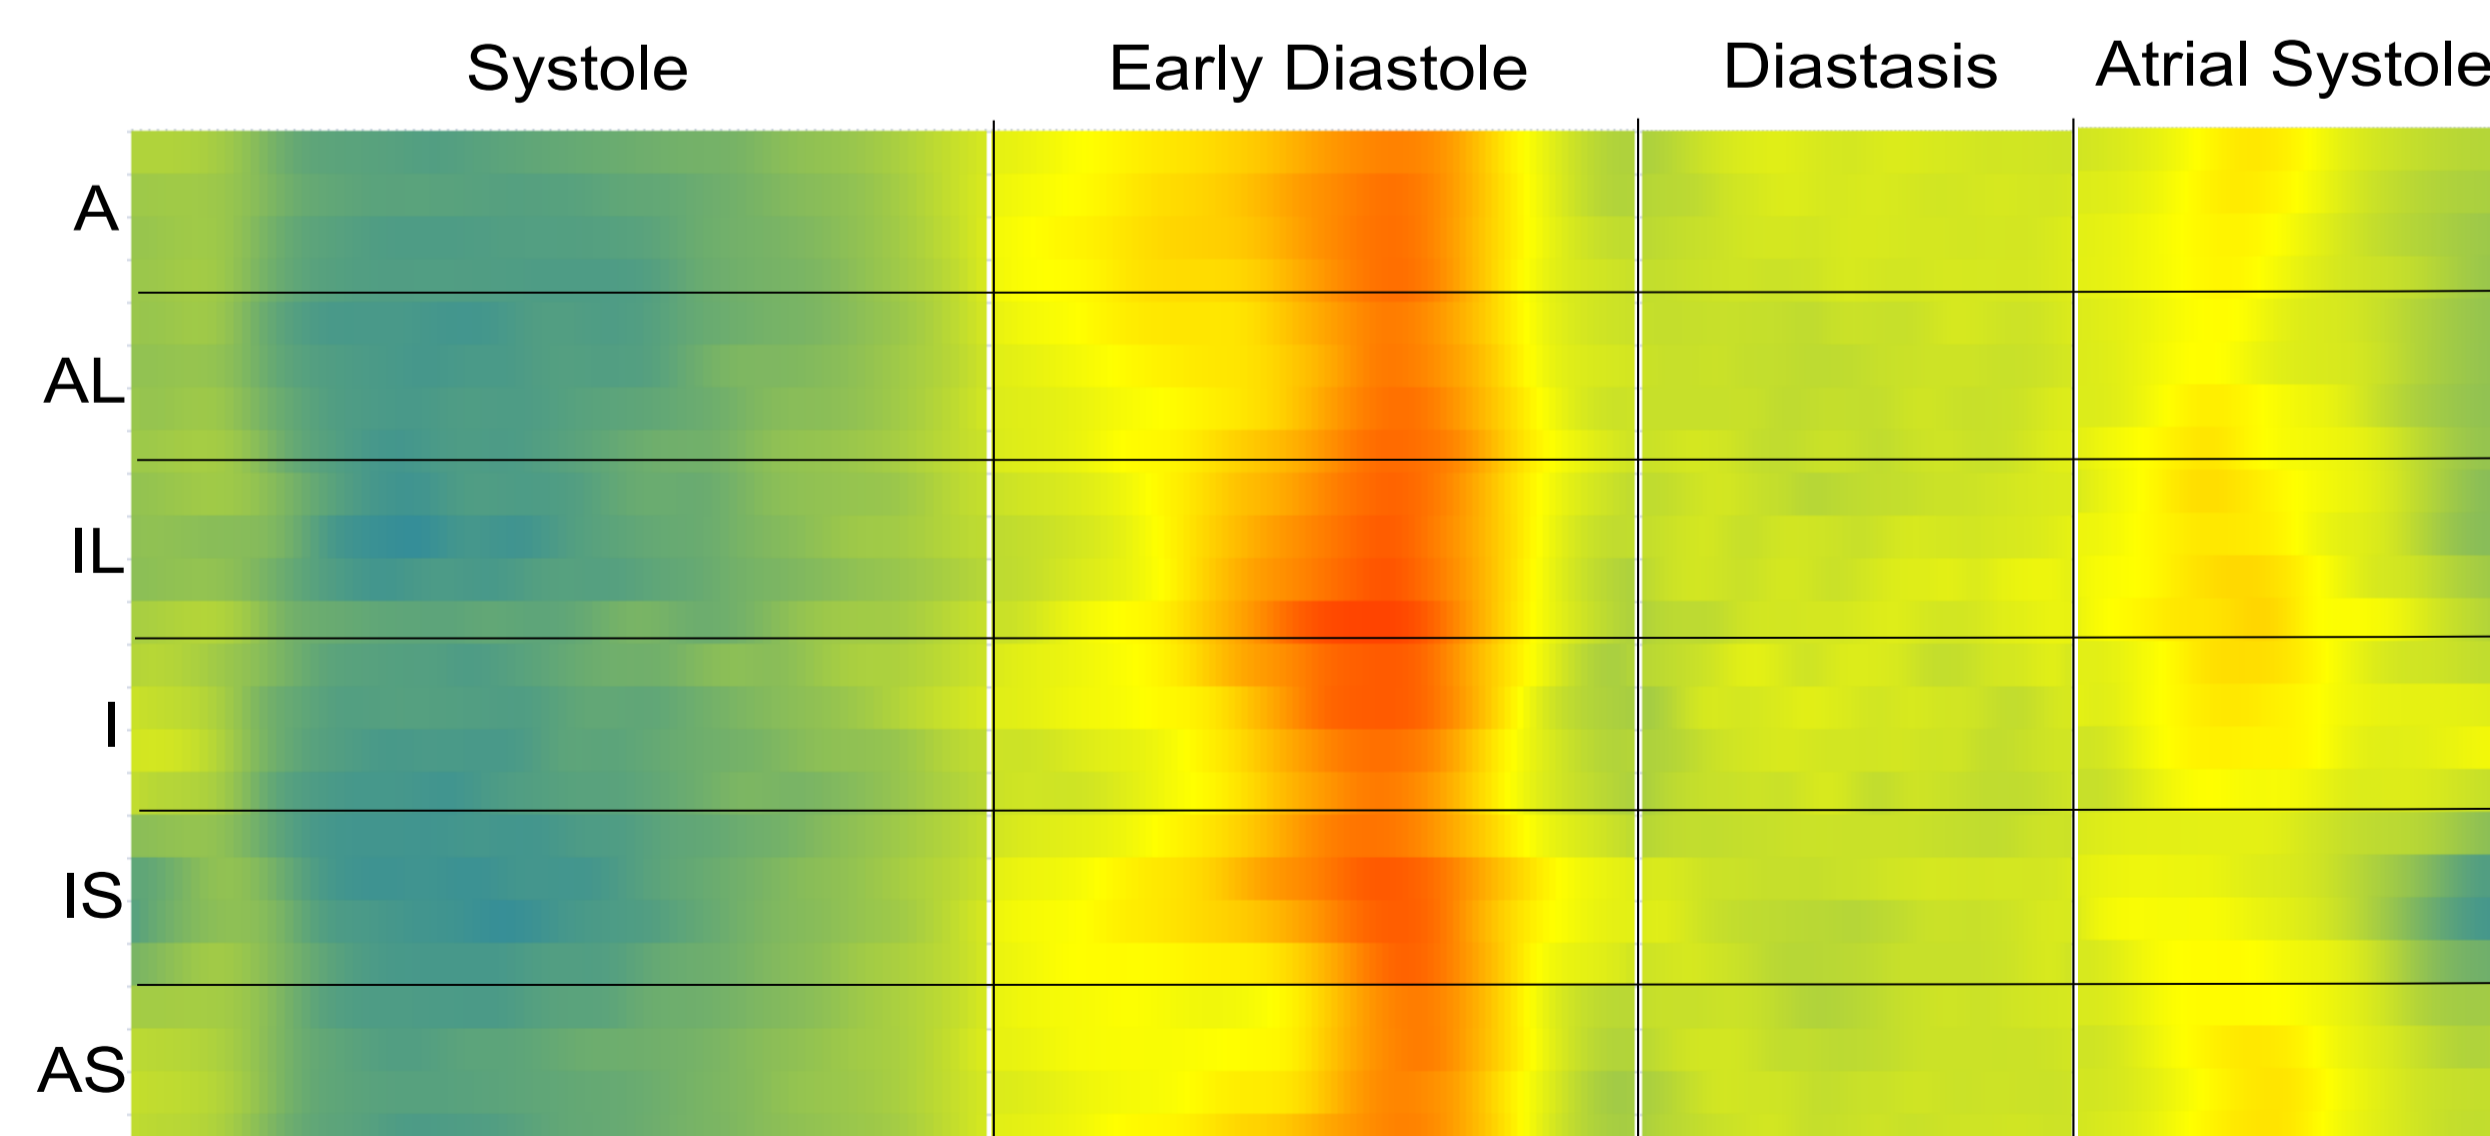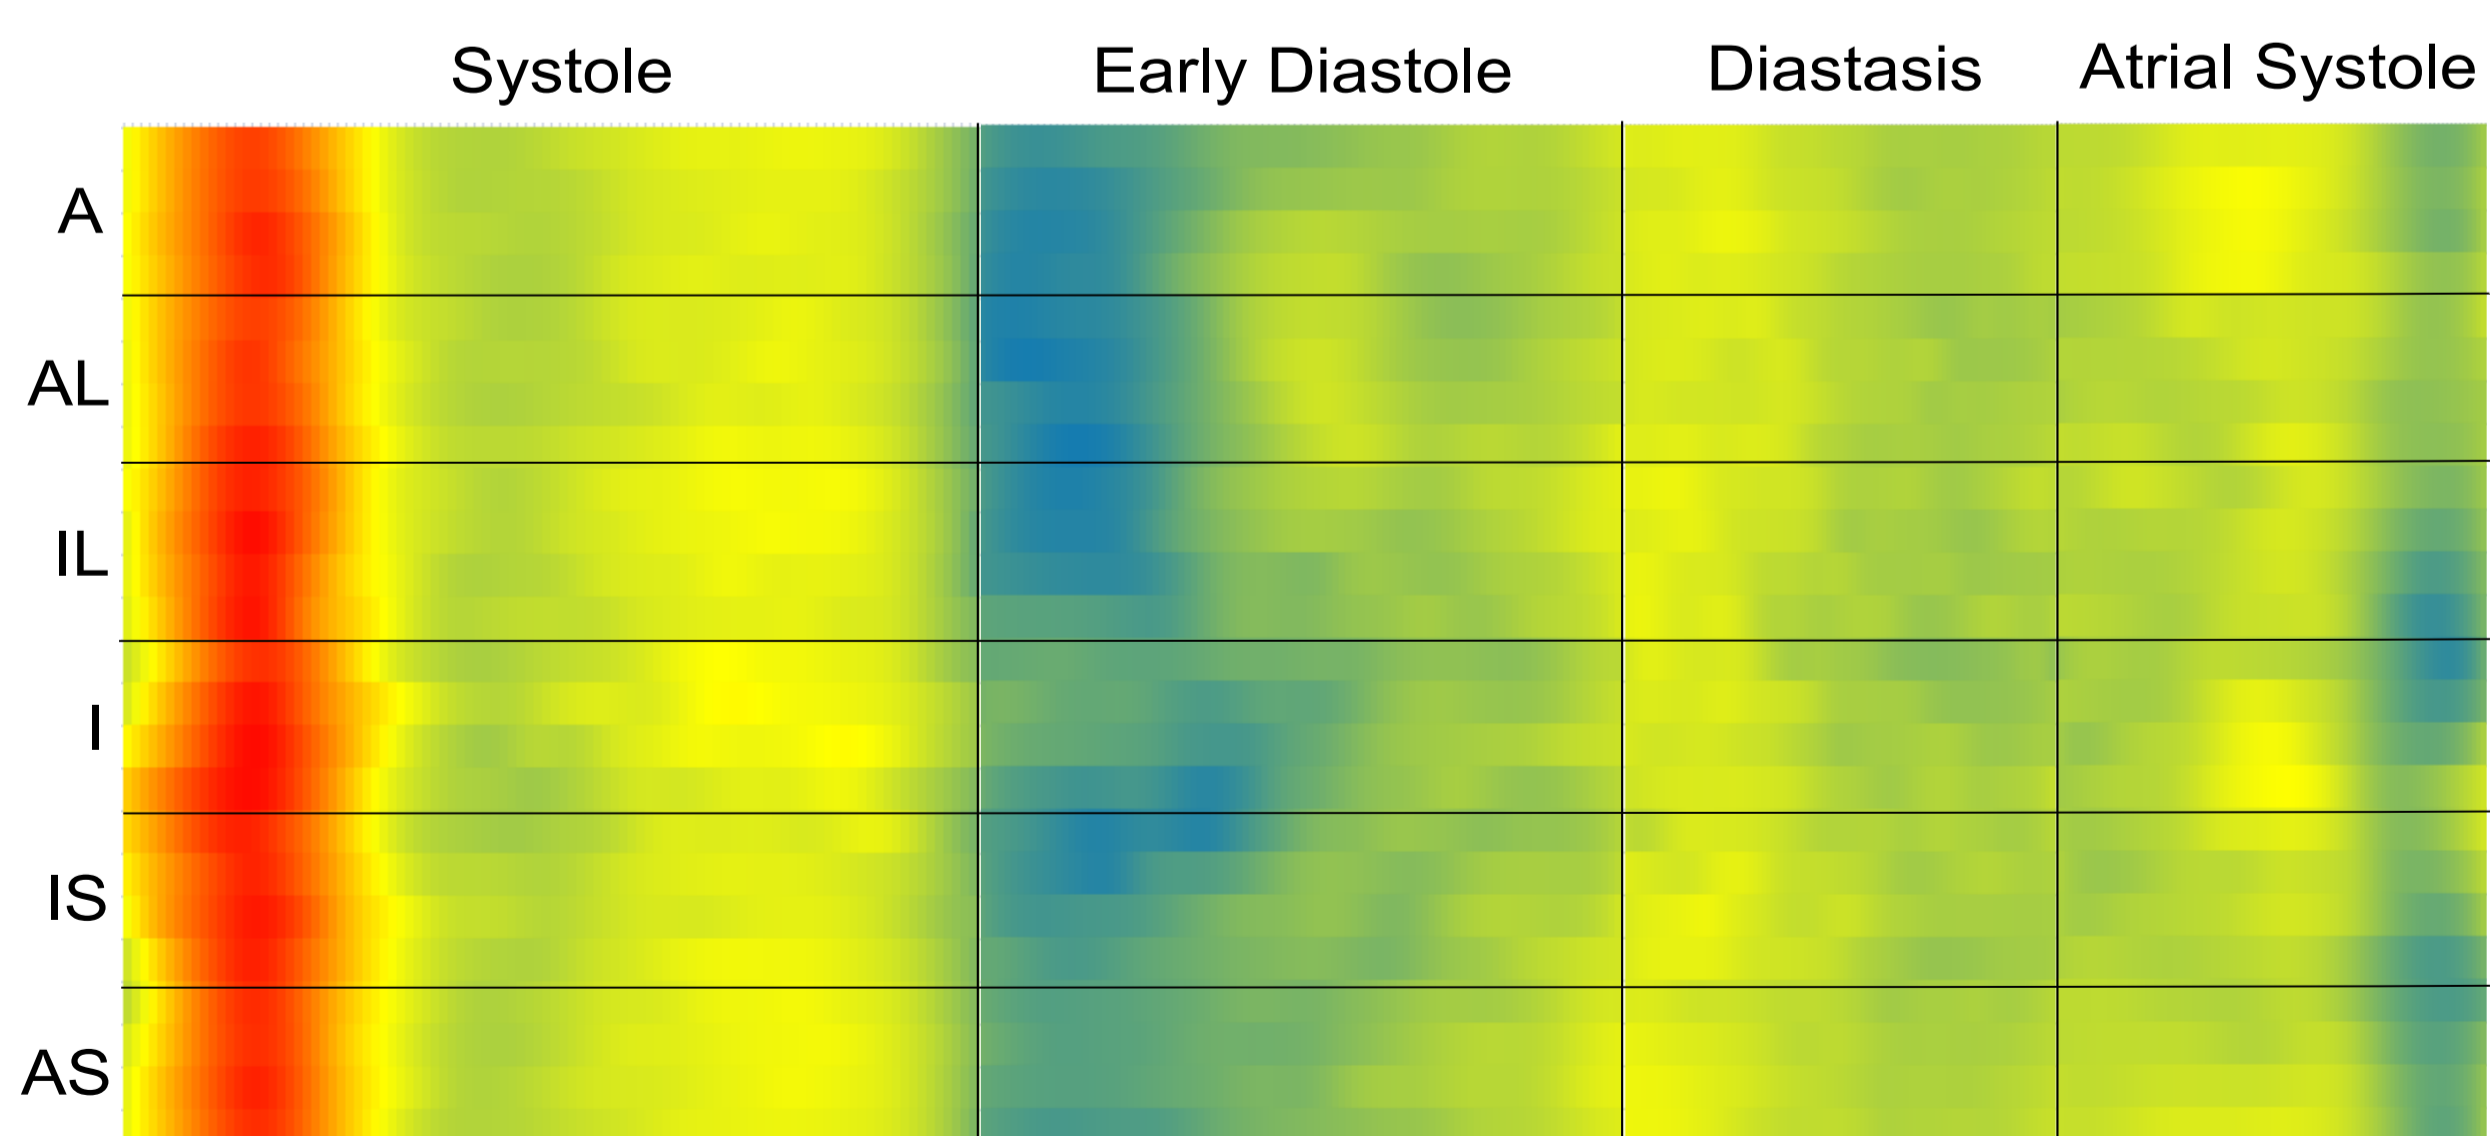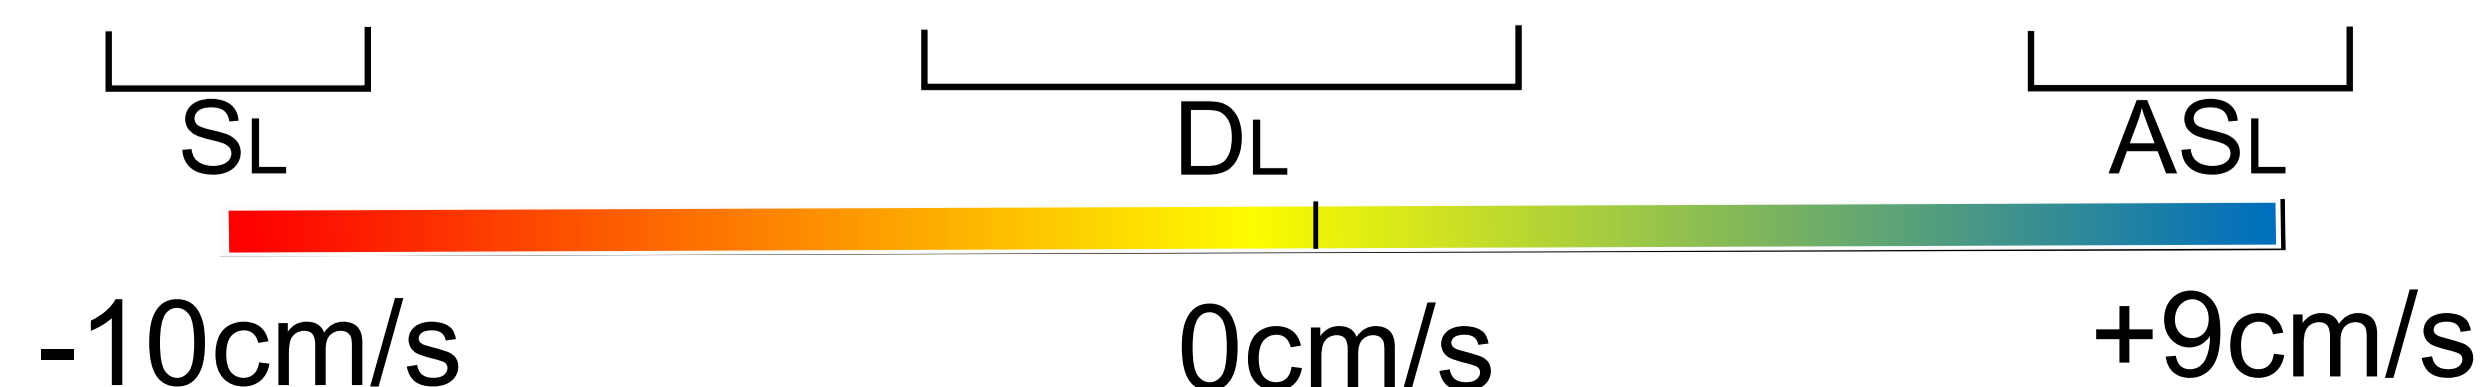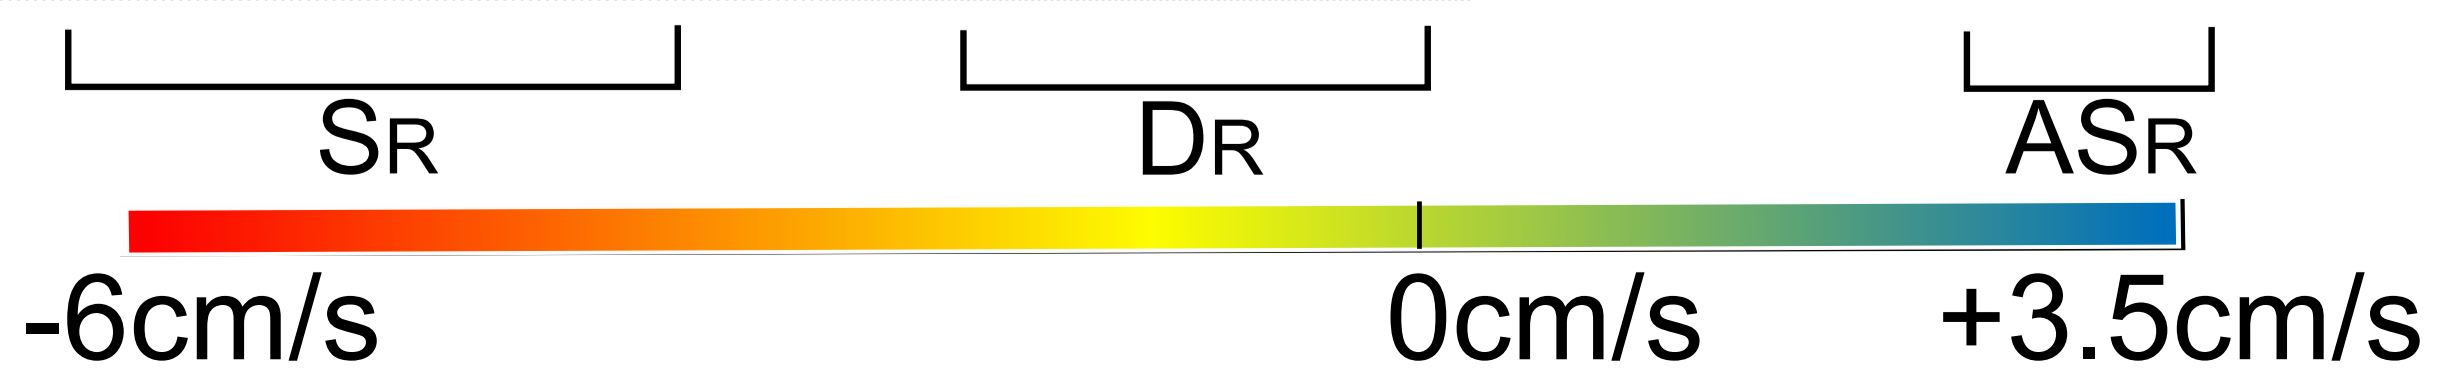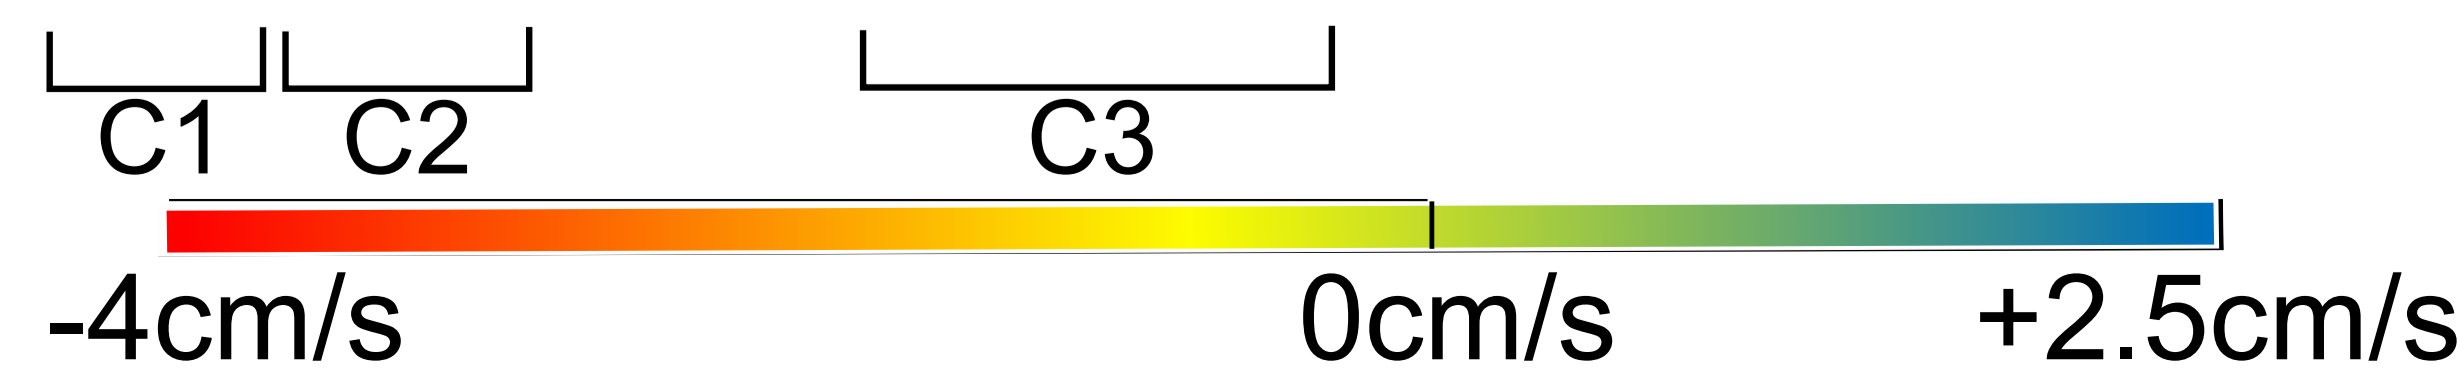

Supplement: MOESM5 [file 9583552]
